# Supplementary material
Source: MDPI journal article supplement (https://www.mdpi.com/1999-4907/13/2/176)
Supplement: s1 [file s1 › forests-1534610-supplementary.pdf]

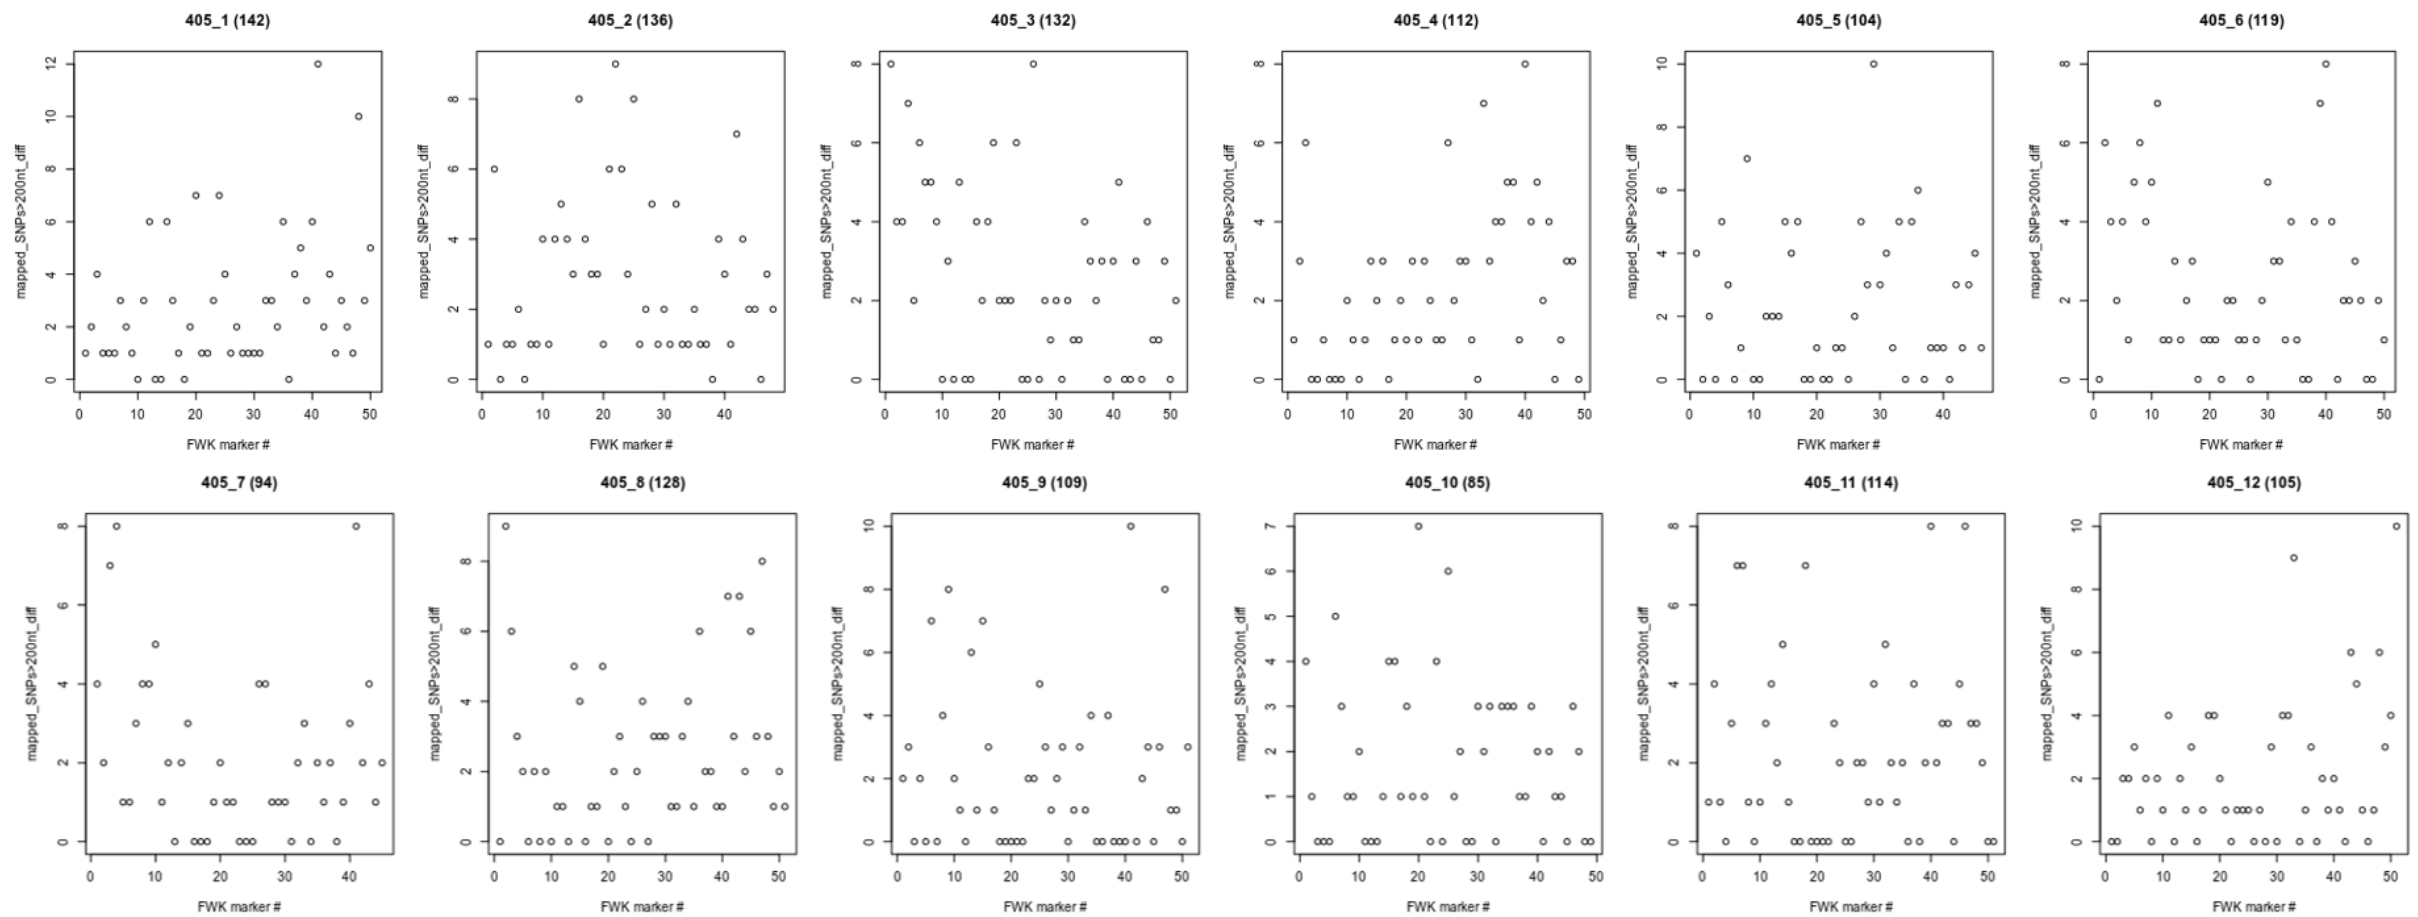

**Figure S1.** Distribution of genotyping array SNPs that map to linkage groups (405\_1 to 405\_12) in radiata pine mapping population 268405 x 268345. Approximate linkage group sizes in cM are in parentheses.

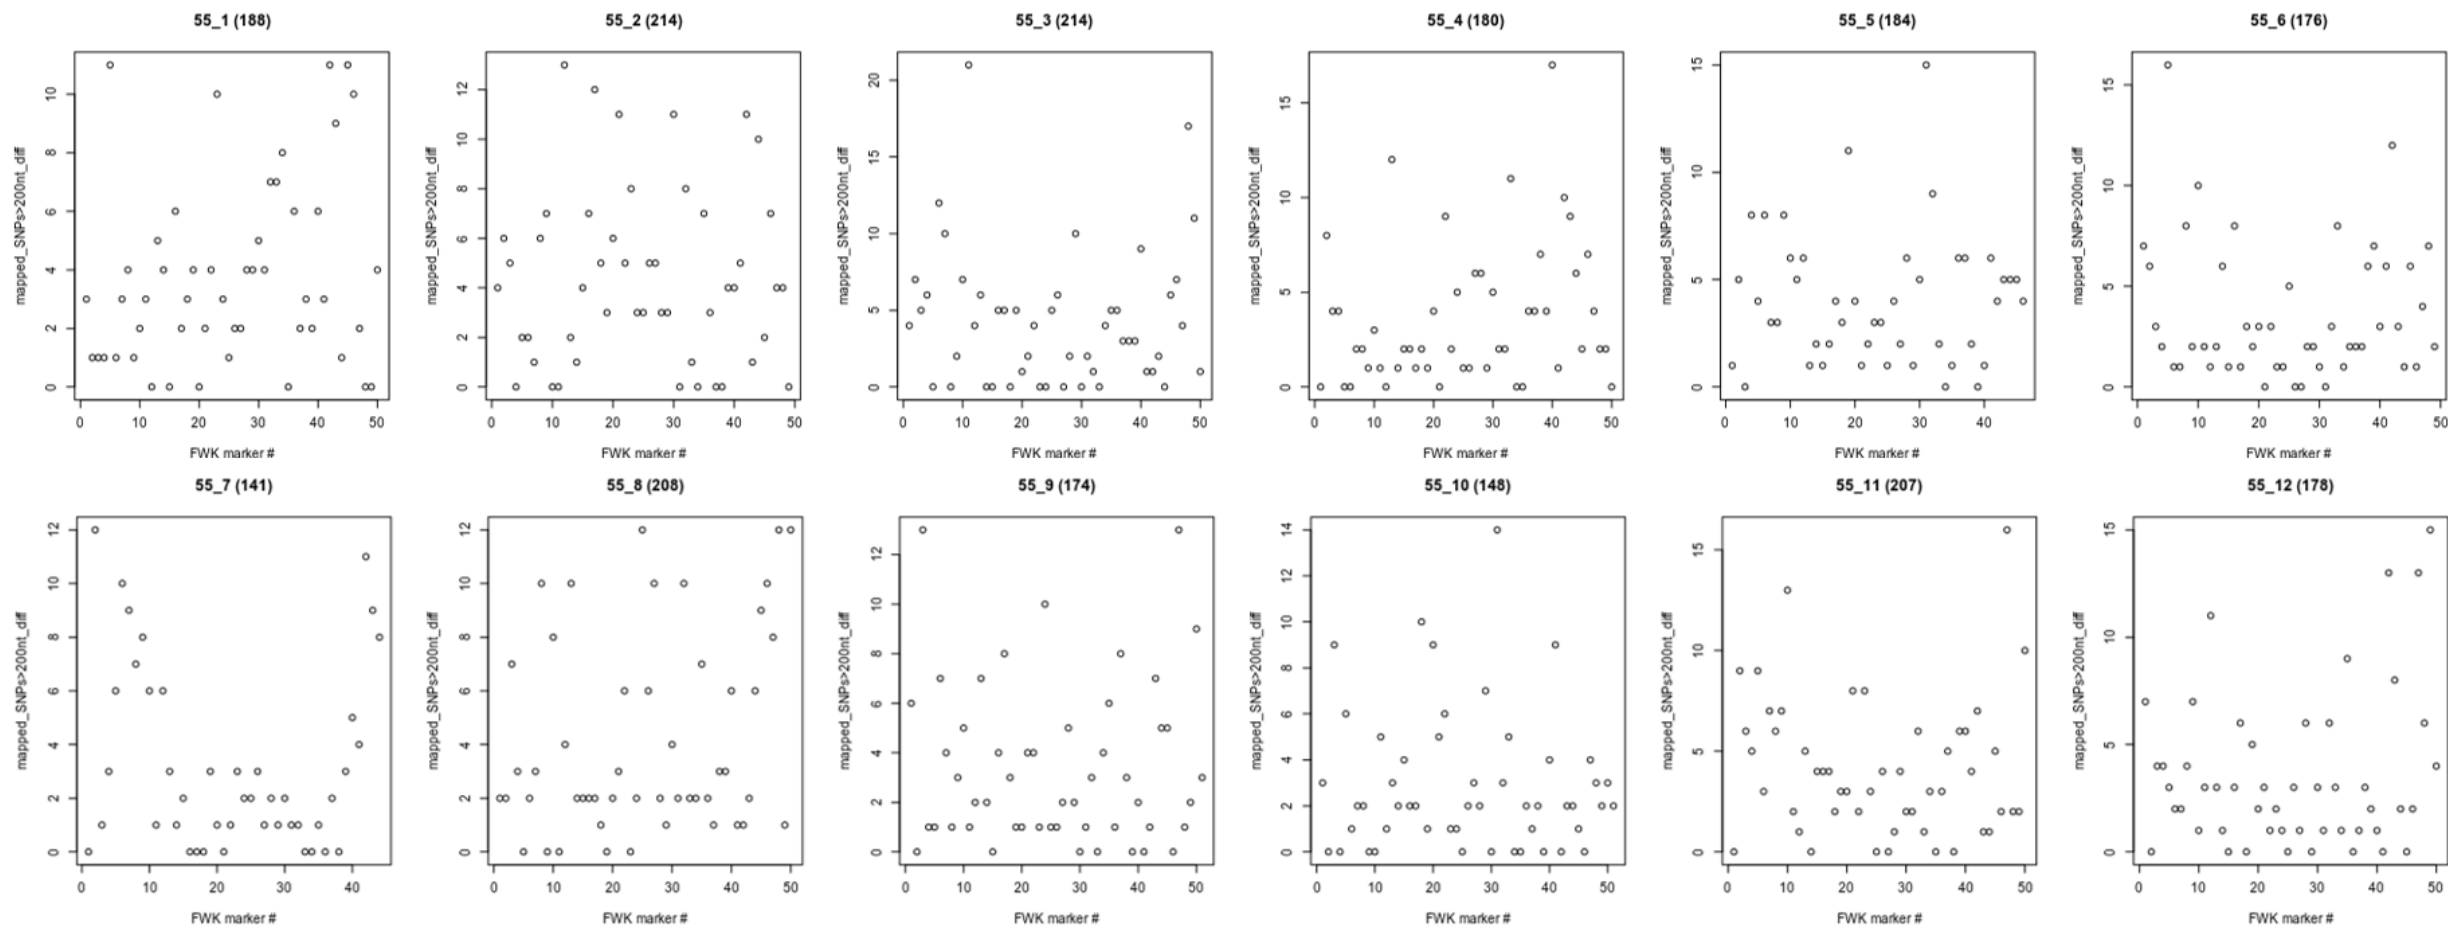

**Figure S2.** Distribution of genotyping array SNPs that map to linkage groups (55\_1 to 55\_12) in radiata pine mapping population 850055x 850096. Approximate linkage group sizes in cM are in parentheses.
